# Supplementary material
Source: PubMed Central journal article supplement (PMC3105522)

## Supporting Information

New naphthoquinones and a new  $\delta$ -lactone produced by endophytic fungi from  
Costa Rica

Shugeng Cao,<sup>a</sup> and Jon Clardy<sup>a,\*</sup>

### List of Supporting Information

**Page S2:** <sup>1</sup>H and <sup>13</sup>C NMR spectra of delitzchianone A (1)

**Page S3:** <sup>1</sup>H and <sup>13</sup>C NMR spectra of delitzchianone B (2)

**Page S4:** <sup>1</sup>H, gHMBC and gHSQC spectra of  $\delta$ -acetoxy pestalopyrone (3)

$^1\text{H}$  spectrum delitzchianone A (1)

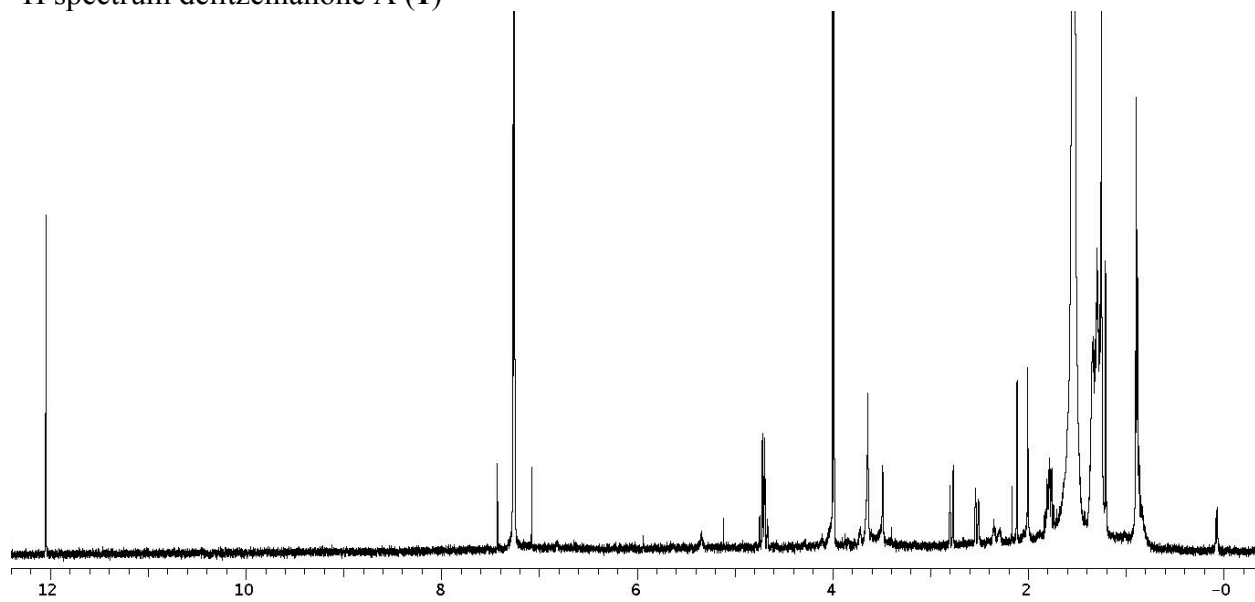

$^{13}\text{C}$  spectrum delitzchianone A (1)

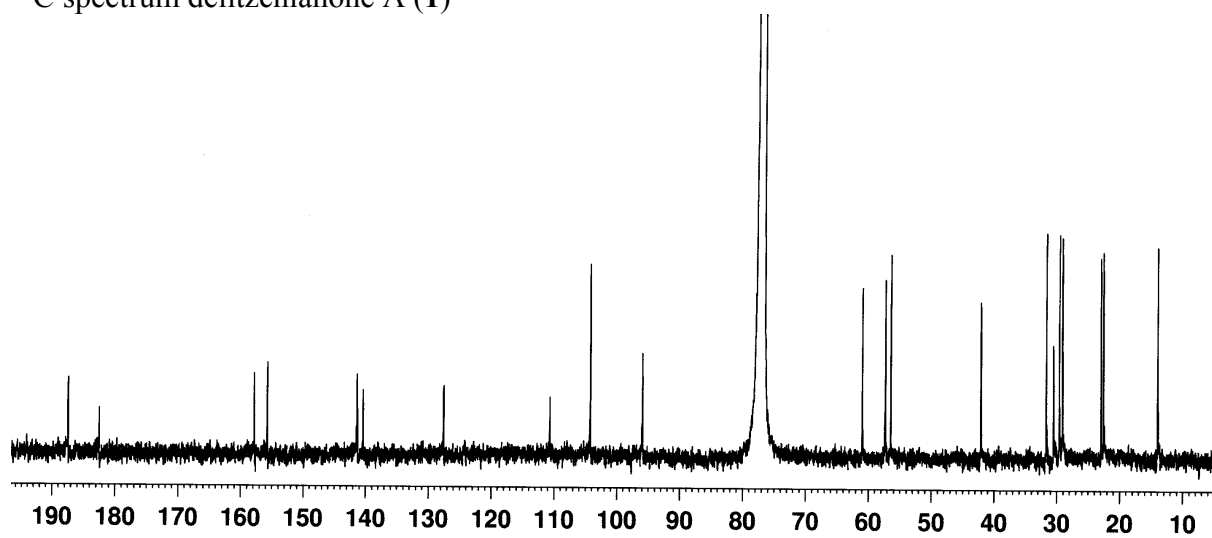

$^1\text{H}$  spectrum delitzchianone B (2)

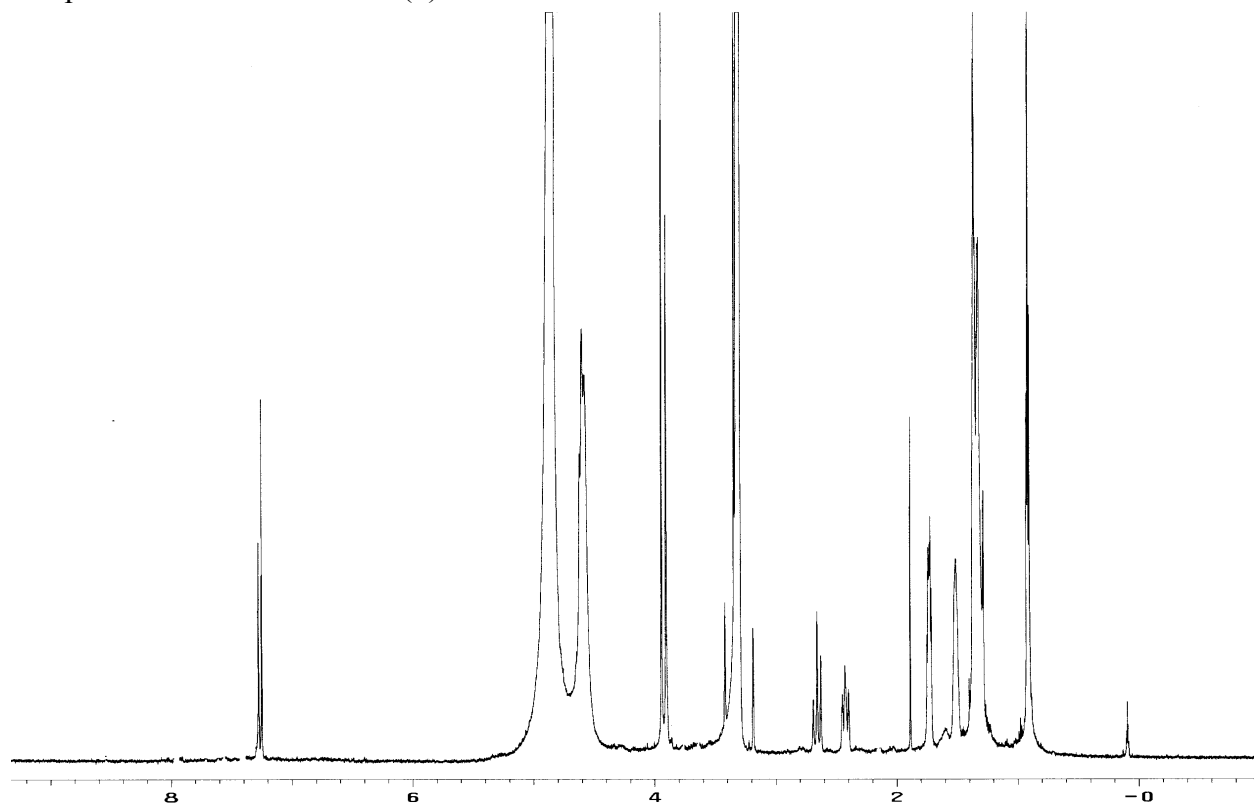

$^{13}\text{C}$  spectrum delitzchianone B (2)

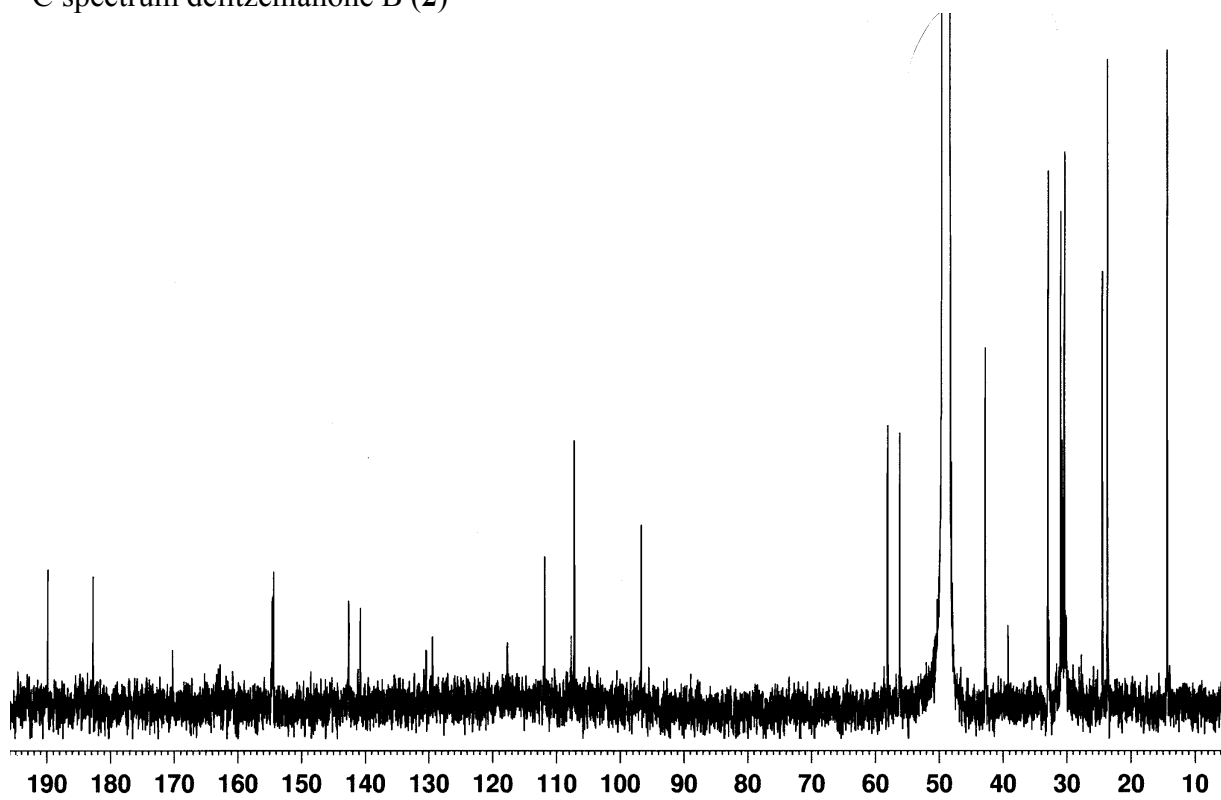

$^1\text{H}$  spectrum 8-acetoxy pestalopyrone (**3**)

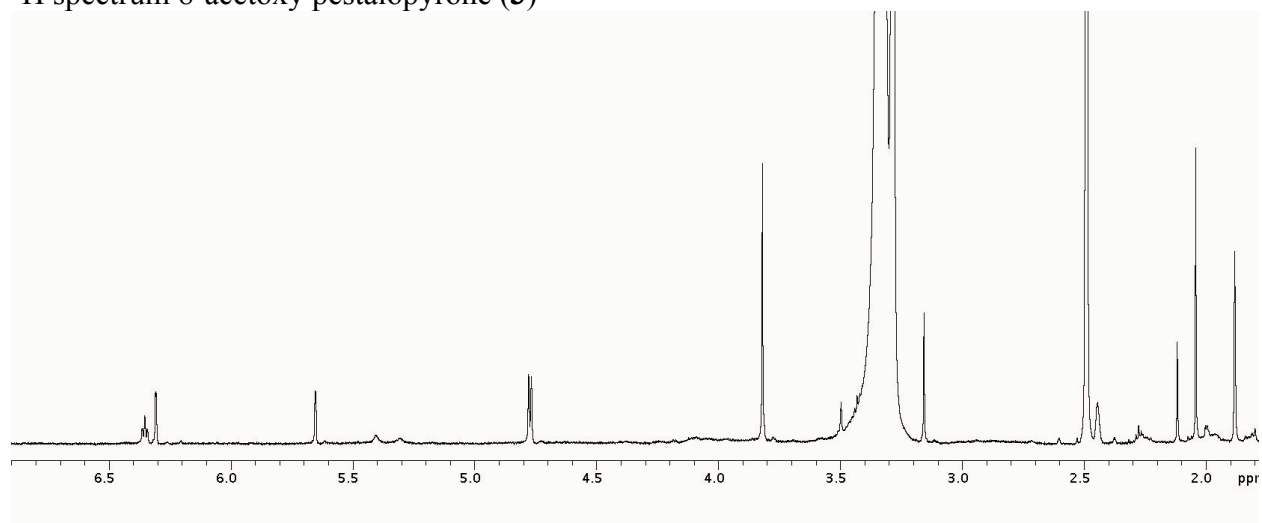

gHMBC spectrum of 8-acetoxy pestalopyrone (**3**)

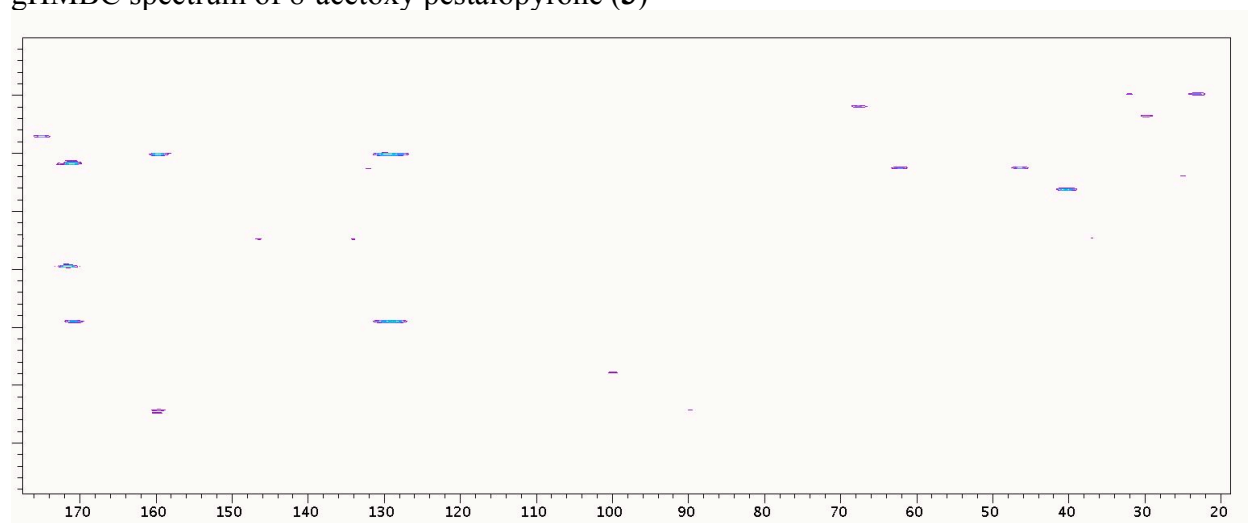

gHSQC spectrum of 8-acetoxy pestalopyrone (**3**)

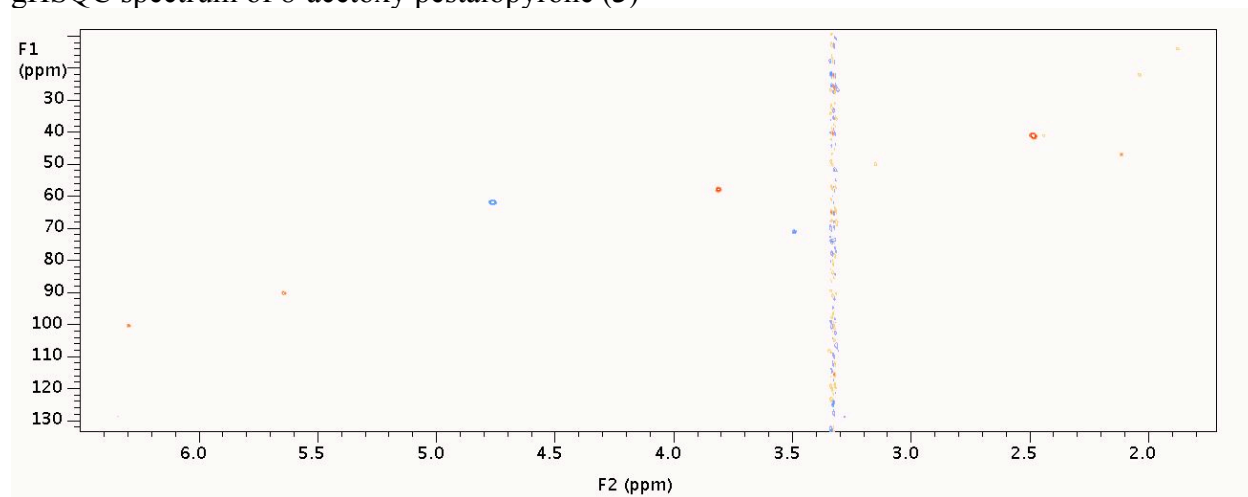

Supplement: NIHMS261227-supplement-01.pdf [file NIHMS261227-supplement-01.pdf]
